# Supplementary material
Source: PubMed Central journal article supplement (PMC11558388)
Supplement: ajtr0016-6159-f4.pdf [file ajtr0016-6159-f4.pdf]

## Wound-healing activity of turmeric-garlic decoction

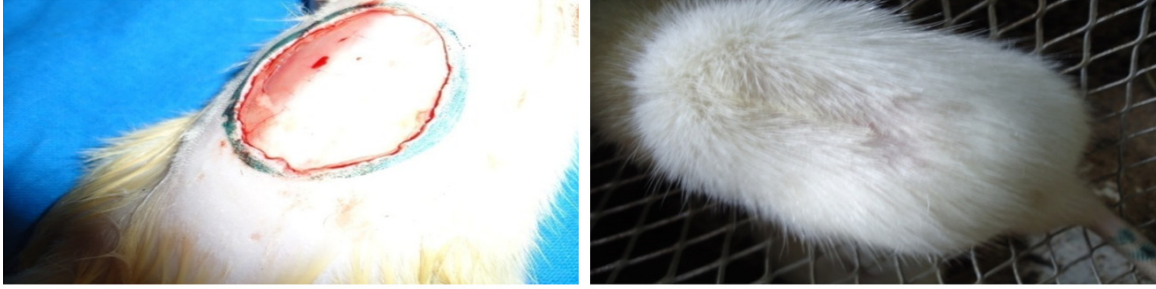

Before treatment

After treatment

**Supplementary Figure 1.** The wound healing action of tumeric-garlic decoctin before and after treatment.
